# Supplementary material for: Synergistic effect of ceria on the structure and hydrogen evolution activity of nickel nanoparticles grown on reduced graphene oxide
Source: Royal Society of Chemistry journal article supplement (doi:10.1039/c7ta00146k), 2017-01-01
Supplement: c7ta00146k1.pdf [file c7ta00146k1.pdf]

**Electronic Supplementary Information (ESI) for Journal of Materials Chemistry A**

**Synergistic Effect of Ceria on the Structure and Hydrogen Evolution Activity of Nickel**

**Nanoparticles Grown on the Reduced Graphene Oxide**

**Mohammad Zhiani <sup>a</sup>, Saeedeh Kamali <sup>a</sup>**

<sup>a</sup>Department of Chemistry, Isfahan University of Technology, Isfahan 84156- 83111, Iran

E-mail address: m\_zhiani@cc.iut.ac.ir, mohammad.zhiani@gmail.com

Saeedehkamali8@gmail.com

**Synthesis of GO:**

Graphite powder added to the sulfuric acid and phosphoric acid mixture (9/1, V/V). Then potassium permanganate was gradually added to the sample in the ice bath. The procedure was followed by stirring at 50 °C for 12 h and then adding the ice water and hydrogen peroxide. The resulted yellow sample was centrifuged and washed with hydrochloric acid/ water solution, then with water and absolute ethanol repeatedly to reach the natural pH.

**Electrochemical calculations:**

The obtained data from LSV measurement were fitted to the Tafel equation as follows:

$$\eta = a + b \log j \quad (1)$$

Where  $\eta$  is the cathode overpotential obtained by eq. 2.  $a$  is the experimental coefficient,  $b$  the Tafel slope and  $j$  is current density. The overpotential ( $\eta$ ) was calculated using eq. 2:

$$\eta = E_{\text{applied}} + E_{\text{ref}} - E^0 \quad (2)$$

Where  $E_{\text{applied}}$  is the obtained experimental potential,  $E_{\text{ref}}$  is the reference electrode potential (0.197 V for Ag/AgCl) and  $E^0$  is the equilibrium HER potential (-0.828 V for pH=14, 298 K).

**Table S1. Description of prepared catalysts samples**

| Sample name        | Preparation method | GO wt% at int. dispersion | Ceria wt% at int. dispersion | Theo. Ni wt% | Actual Ni wt% (by ICP result) |
|--------------------|--------------------|---------------------------|------------------------------|--------------|-------------------------------|
| Ni/rGO             | SBH reduction      | 100                       | 0                            | 20           | 24.6                          |
| Ni/Ceria-rGO (1,3) | SBH reduction      | 75                        | 25                           | 20           | 19.8                          |
| Ni/Ceria-rGO (1,1) | SBH reduction      | 50                        | 50                           | 20           | 22.7                          |
| Ni/Ceria-rGO (3,1) | SBH reduction      | 25                        | 75                           | 20           | 14.2*                         |
| Ni/Ceria           | Wet impregnation   | 0                         | 100                          | 20           | 20.8                          |

\* Too much deviation from the theoretical value for the Ni/Ceria-rGO (3,1) can be attributed to the lacking of adequate functional groups for involving the Ni<sup>2+</sup> ions at the synthesis procedure.

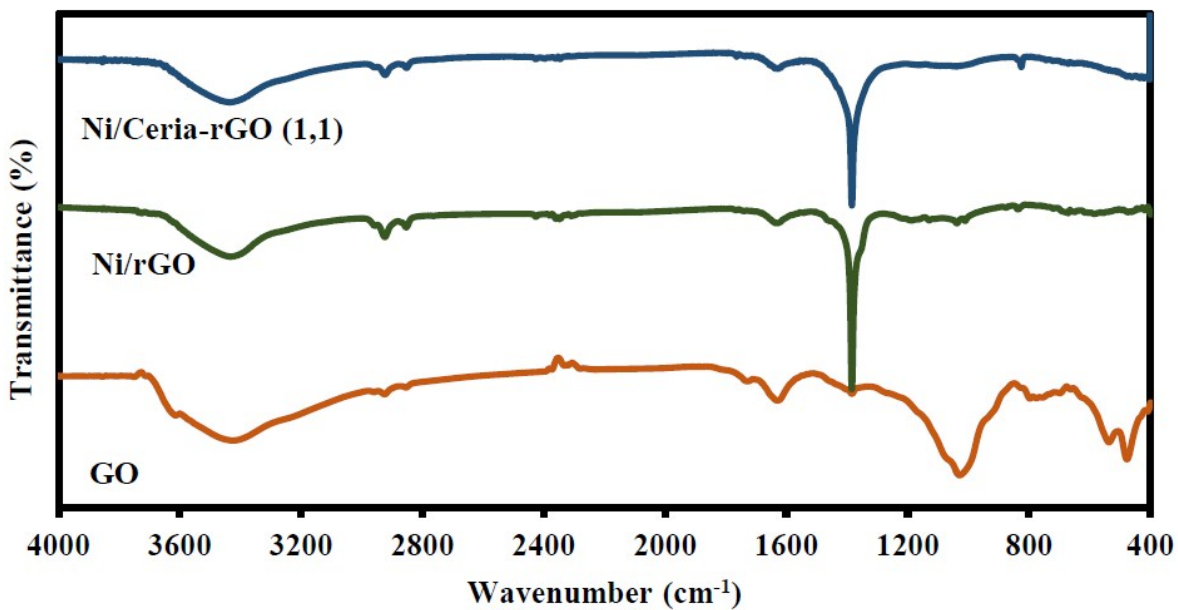

**Figure S1. FT-IR spectra of GO, Ni/rGO and Ni/Ceria-rGO (1,1)**

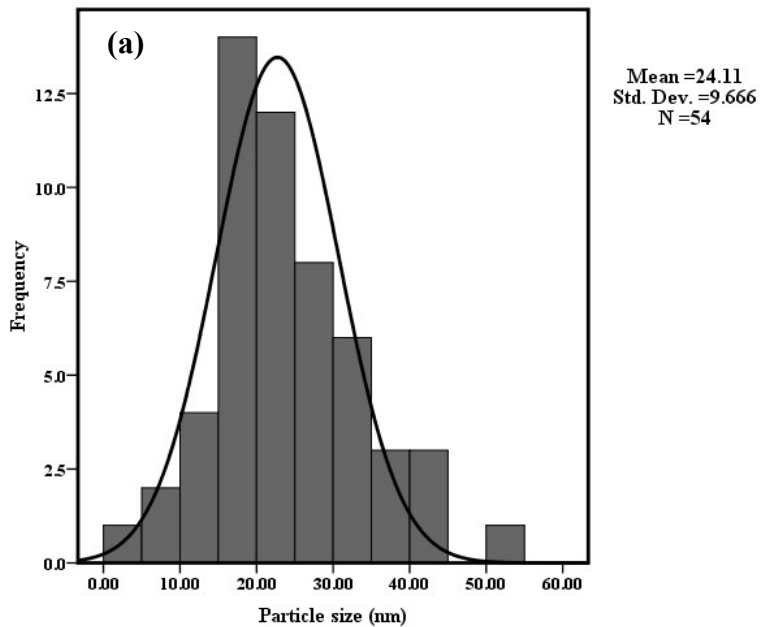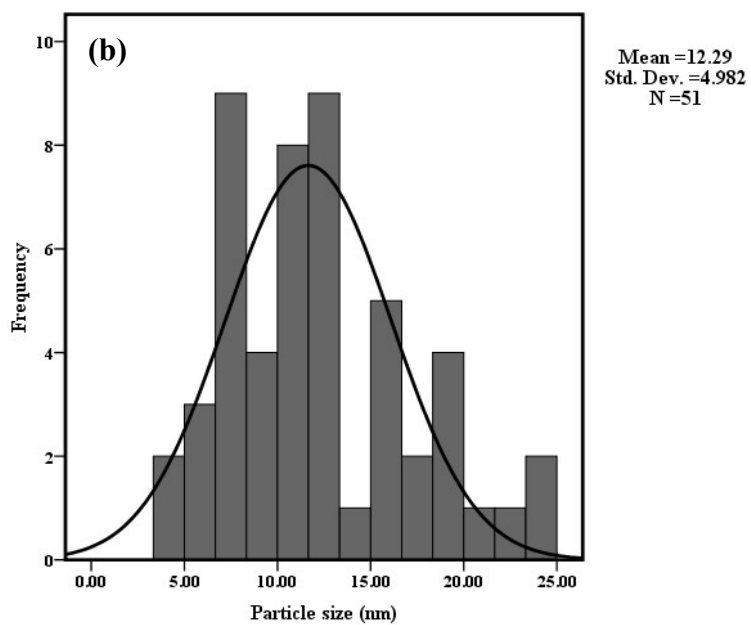

**Figure S2. Size distribution histogram of Ni nanoparticles for (a) Ni/rGO and (b) Ni/Ceria-rGO (1,1)**

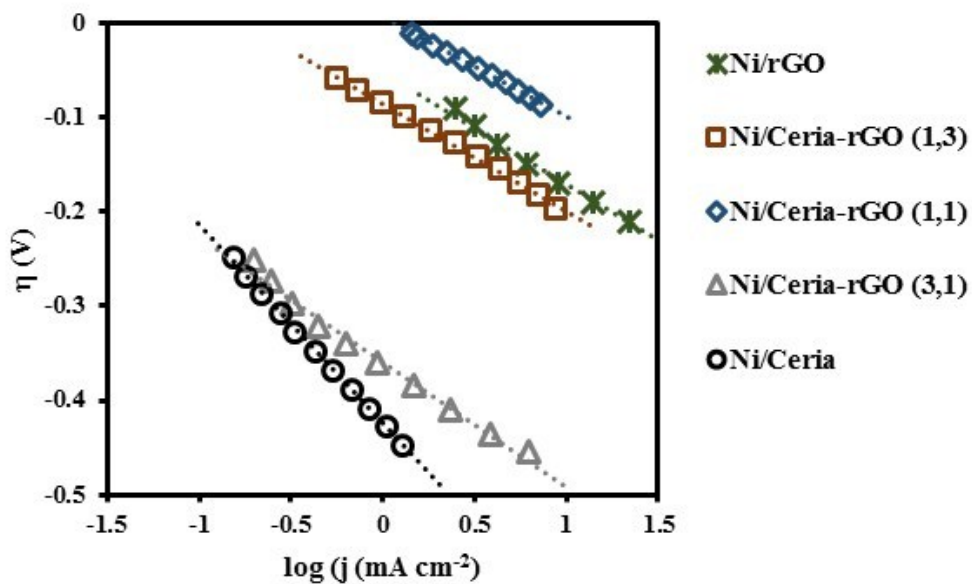

Figure S3. Tafel plots of the electrodes

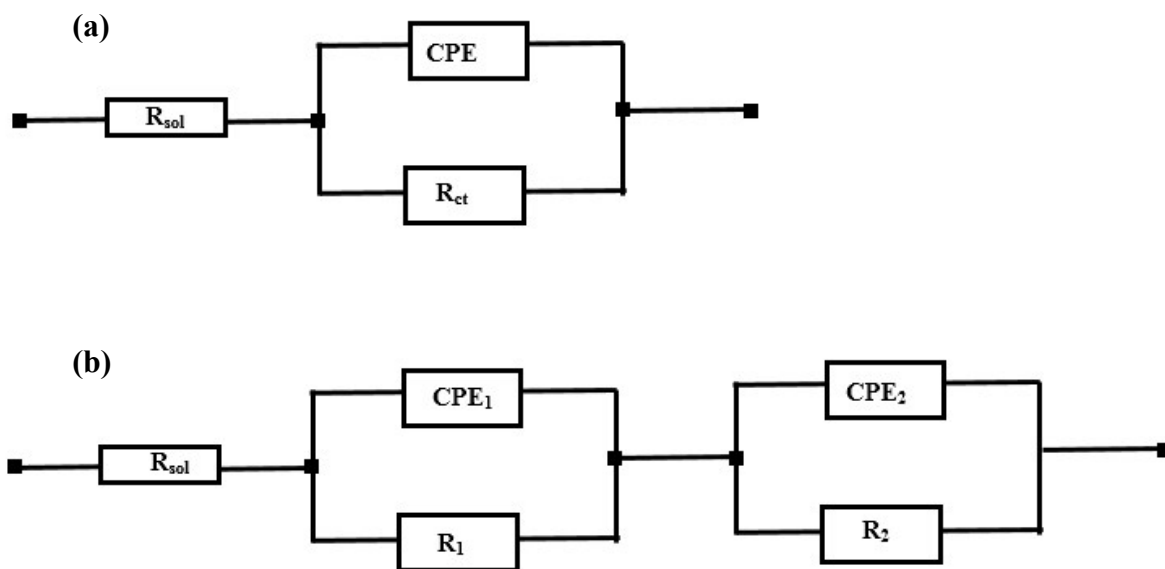

Figure S4. Equivalent circuit models used to fit the EIS response of HER on the (a) Ni/rGO and Ni/Ceria-rGO (1,3 and 1,1) and (b) Ni/Ceria-rGO (3,1) and Ni/Ceria

**Table S2. An overview of the reported HER parameters for some non-noble electrocatalysts in the literatures in comparison to the current study**

| sample                                        | Electrolyte | $\eta$ / mV (Current Density which $\eta$ measured in) | -b/ mV. dec <sup>-1</sup> | [ref.]        |
|-----------------------------------------------|-------------|--------------------------------------------------------|---------------------------|---------------|
| <b>Fe<sub>2</sub>P/NGr</b>                    | 1 M KOH     | -355 (10)                                              | -                         | [1]           |
| <b>Ni<sub>2</sub>P-G@NF</b>                   | 1 M KOH     | -7 (onset)                                             | 30                        | [2]           |
| <b>Fe-Ni-graphene</b>                         | 6 M KOH     | -111 (onset)                                           | 92.6                      | [3]           |
| <b>N-C@Ni-Al<sub>2</sub>O<sub>3</sub>@GO</b>  | 1 M NaOH    | -75 (onset)                                            | 115.1                     | [4]           |
| <b>RGO-Ni foam</b>                            | 1 M KOH     | -                                                      | 130                       | [5]           |
| <b>Ni<sub>3</sub>S<sub>2</sub>/MWCNT-NC</b>   | 1 M KOH     | -340 (10)                                              | 102                       | [6]           |
| <b>Cu/NiCu</b>                                | 1 M KOH     | -269 (100)                                             | 149                       | [7]           |
| <b>Ni-P + TiO<sub>2</sub> + Ti</b>            | 5 M KOH     | -288 (100)                                             | 152                       | [8]           |
| <b>Ni-Mo</b>                                  | 6 M KOH     | -                                                      | 116                       | [9]           |
| <b>Ni-S-Mn</b>                                | 30 wt.% KOH | -107 (200)                                             | 282                       | [10]          |
| <b>Ni-S-Co</b>                                | 30 wt.% KOH | -                                                      | 195.6                     | [11]          |
| <b>NiFe nanosheets</b>                        | 1 M KOH     | -139 (10)                                              | 112                       | [12]          |
| <b>Ni-G/304 SS</b>                            | 0.1 M KOH   | -75 (onset)                                            | 182.04                    | [13]          |
| <b>NiCo</b>                                   | 30 wt.% KOH | - 166 (100)                                            | 117.7                     | [14]          |
| <b>Ni-NiO/N-rGO/ Ni foam</b>                  | 1 M KOH     | -160 (20)                                              | 46                        | [15]          |
| <b>Co-CoO/N-rGO/ Ni foam</b>                  | 1 M KOH     | -170 (20)                                              | 51                        | [15]          |
| <b>nitrogen-rich holey graphene monoliths</b> | 0.1 M KOH   | -300 (onset)                                           | 157                       | [16]          |
| <b>Graphene/N-doped amorphous carbon</b>      | 1 M KOH     | -370 (10)                                              | 169                       | [17]          |
| <b>nickel-phosphorus-graphite composite</b>   | 1 M NaOH    | -242.4 (250)                                           | 90.9                      | [18]          |
| <b>Ni-Sn@C</b>                                | 1 M NaOH    | -192 (onset)                                           | 145                       | [19]          |
| <b>CoMn-S@NiO/CC</b>                          | 1 M KOH     | -232 (100)                                             | 147.3                     | [20]          |
| <b>Ni/Ceria-rGO (50)</b>                      | 1 M KOH     | -15 (onset)<br>-111 (10)<br>-170 (20)                  | 107.3                     | Current Study |

## References:

1. Z. Huang, C. Lv, Z. Chen, F. Tian and C. Zhang, *Nano Energy*, 2015, 12, 666-674.
2. A. Han, S. Jin, H. Chen, H. Ji, Z. Sun and P. Du, *Journal of Materials Chemistry A*, 2015, 3, 1941-1946.
3. S. Badrayyana, D. K. Bhat, S. Shenoy, Y. Ullal, and A. C. Hegde, *International Journal of Hydrogen Energy*, 2015, 40, 10453-10462.
4. J. Wang, T. Qiu, X. Chen, Y. Lu, and W. Yang, *Journal of Power Sources*, 2015, 293, 178-186.
5. D. Chanda, J. Hnát, A. S. Dobrota, I. A. Pašti, M. Paidar and K. Bouzek, *Physical Chemistry Chemical Physics*, 2015, 17, 26864-26874.
6. T. W. Lin, C. J. Liu and C. S. Dai, *Applied Catalysis B: Environmental*, 2014, 154, 213-220.
7. R. Solmaz, A. Döner and G. Kardaş, *international journal of hydrogen energy*, 2009, 34(5), 2089-2094
8. B. Łosiewicz, A. Budniok, E. Rówiński, E. Łągiewka and A. Lasia, *Journal of applied electrochemistry*, 2004, 34, 507-516.
9. G. S. Tasic, S. P. Maslovara, D. L. Zugic, A. D. Maksic and M. P. M. Kaninski, *International journal of hydrogen energy*, 2011, 36, 11588-11595.
10. Z. Shan, Y. Liu, Z. Chen, G. Warrender and J. Tian, *International Journal of Hydrogen Energy*, 2008, 33, 28-33.
11. T. C. Yuan, R. D. Li, K. C. Zhou, *Transactions of Nonferrous Metals Society of China*, 2007, 17, 762-765.

12. Q. Luo, M. Peng, X. Sun, Y. Luo and A. M. Asiri, *International Journal of Hydrogen Energy*, 2016, 41, 8785-8792.
13. Y. G. Huang, H. L. Fan, Z. K. Chen, C. B. Gu, M. X. Sun, H. Q. Wang and Q. Y. Li, *International Journal of Hydrogen Energy*, 2016, 41, 3786-3793.
14. C. González-Buch, I. Herraiz-Cardona and V. Pérez-Herranz, *Chemical Engineering Transactions*, 2013, 32, 865-870
15. X. Liu, W. Liu, M. Ko, M. Park, M. G. Kim, P. Oh and J. Cho, *Advanced Functional Materials*, 2015, 25, 5799-5808.
16. J. M. Ge, B. Zhang, L. B. Lv, H. H. Wang, T. N. Ye, X. Wei and J. S. Chen, *Nano Energy*, 2015, 15, 567-575.
17. Y. hao, F. Yan, X. Yu, C. Li, C. Zhu and Y. Chen, *Science China Physics, Mechanics & Astronomy*, 2015, 58, 1-2.
18. R. K. Shervedani, A. H. Alinoori and A. R. Madram, *J New Mater Electrochem Syst*, 2008, 11, 259-265.
19. L. Lang, Y. Shi, J. Wang, F. B. Wang and X. H. Xia, *ACS applied materials & interfaces*, 2015, 7, 9098-9102.
20. Q. Li, Z. Xing, D. Wang, X. Sun and X. Yang, *ACS Catalysis*, 2016, 6, 2797-2801.
